# Supplementary material for: Single cell atlas identifies lipid-processing and immunomodulatory endothelial cells in healthy and malignant breast
Source: PubMed Central journal article supplement (PMC9489707; doi:10.1038/s41467-022-33052-y), 2022-09-20
Supplement: 41467_2022_33052_MOESM2_ESM.pdf [file 41467_2022_33052_MOESM2_ESM.pdf]

### **Description of Additional Supplementary Files**

File Name: Supplementary Data 1

Description: Clinical characteristics of patients.

File Name: Supplementary Data 2

Description: Quality metrics scRNA & parameters of in silico selection, visualization & clustering.

File Name: Supplementary Data 3

Description: EC clusters: putative function, tabulation of top-ranking marker genes and gene sets.

File Name: Supplementary Data 4

Description: Putative function, tabulation of top-ranking marker genes in major stromal cell clusters.

File Name: Supplementary Data 5

Description: Tabulation of predicted RLI interactions between immune cells and angiogenic/venous ECs.

File Name: Supplementary Data 6

Description: Patient demographics, clinical characteristics, survival, and multivariate Cox regression analysis by study group.
